# Supplementary material for: Oxygen-rich microporous carbons with exceptional hydrogen storage capacity
Source: PubMed Central journal article supplement (PMC5691040; doi:10.1038/s41467-017-01633-x), 2017-11-16
Supplement: 41467_2017_1633_MOESM1_ESM.pdf [file 41467_2017_1633_MOESM1_ESM.pdf]

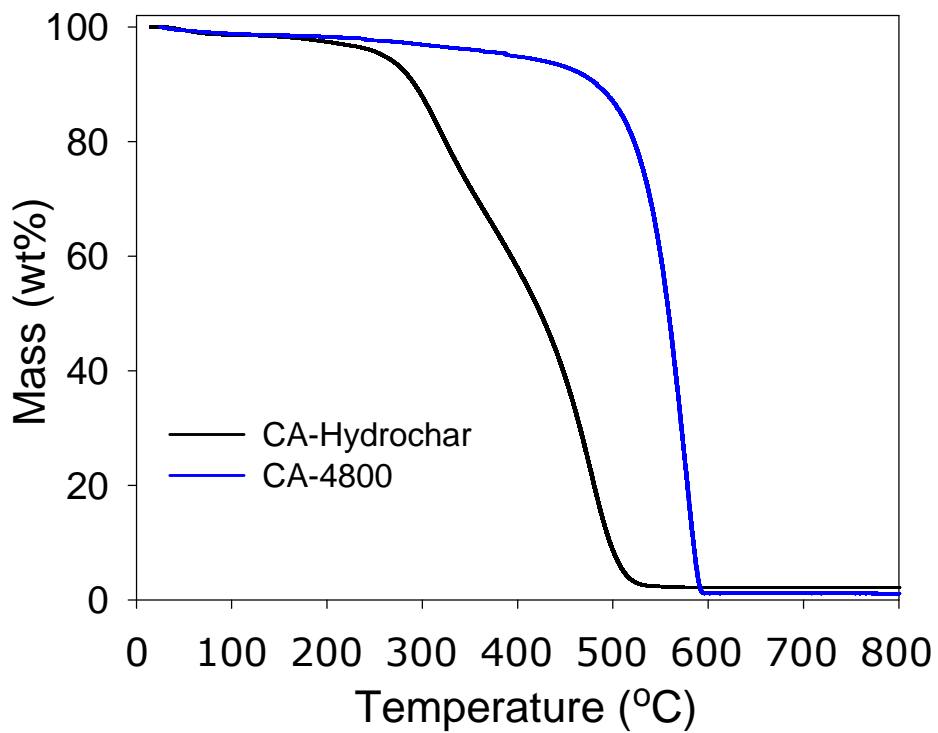

**Supplementary Figure 1.** Thermogravimetric analysis (TGA) curve of CA-hydrochar prepared from cellulose acetate and activated carbon (CA-4800) derived from the hydrochar via activation at 800 °C and KOH/hydrochar ratio of 4.

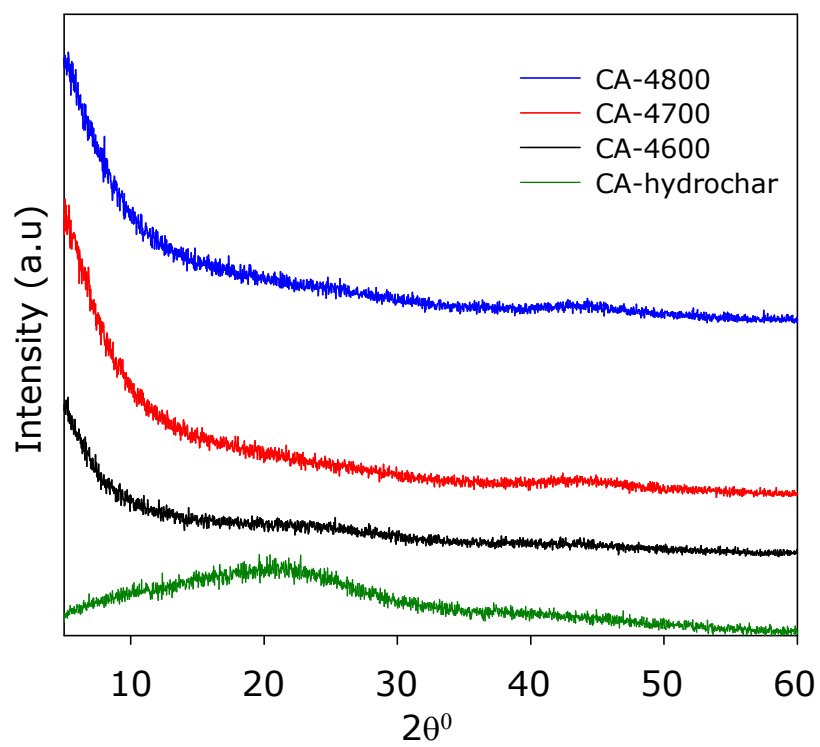

**Supplementary Figure 2.** Powder XRD patterns of CA-hydrochar and activated carbons prepared from cellulose acetate.

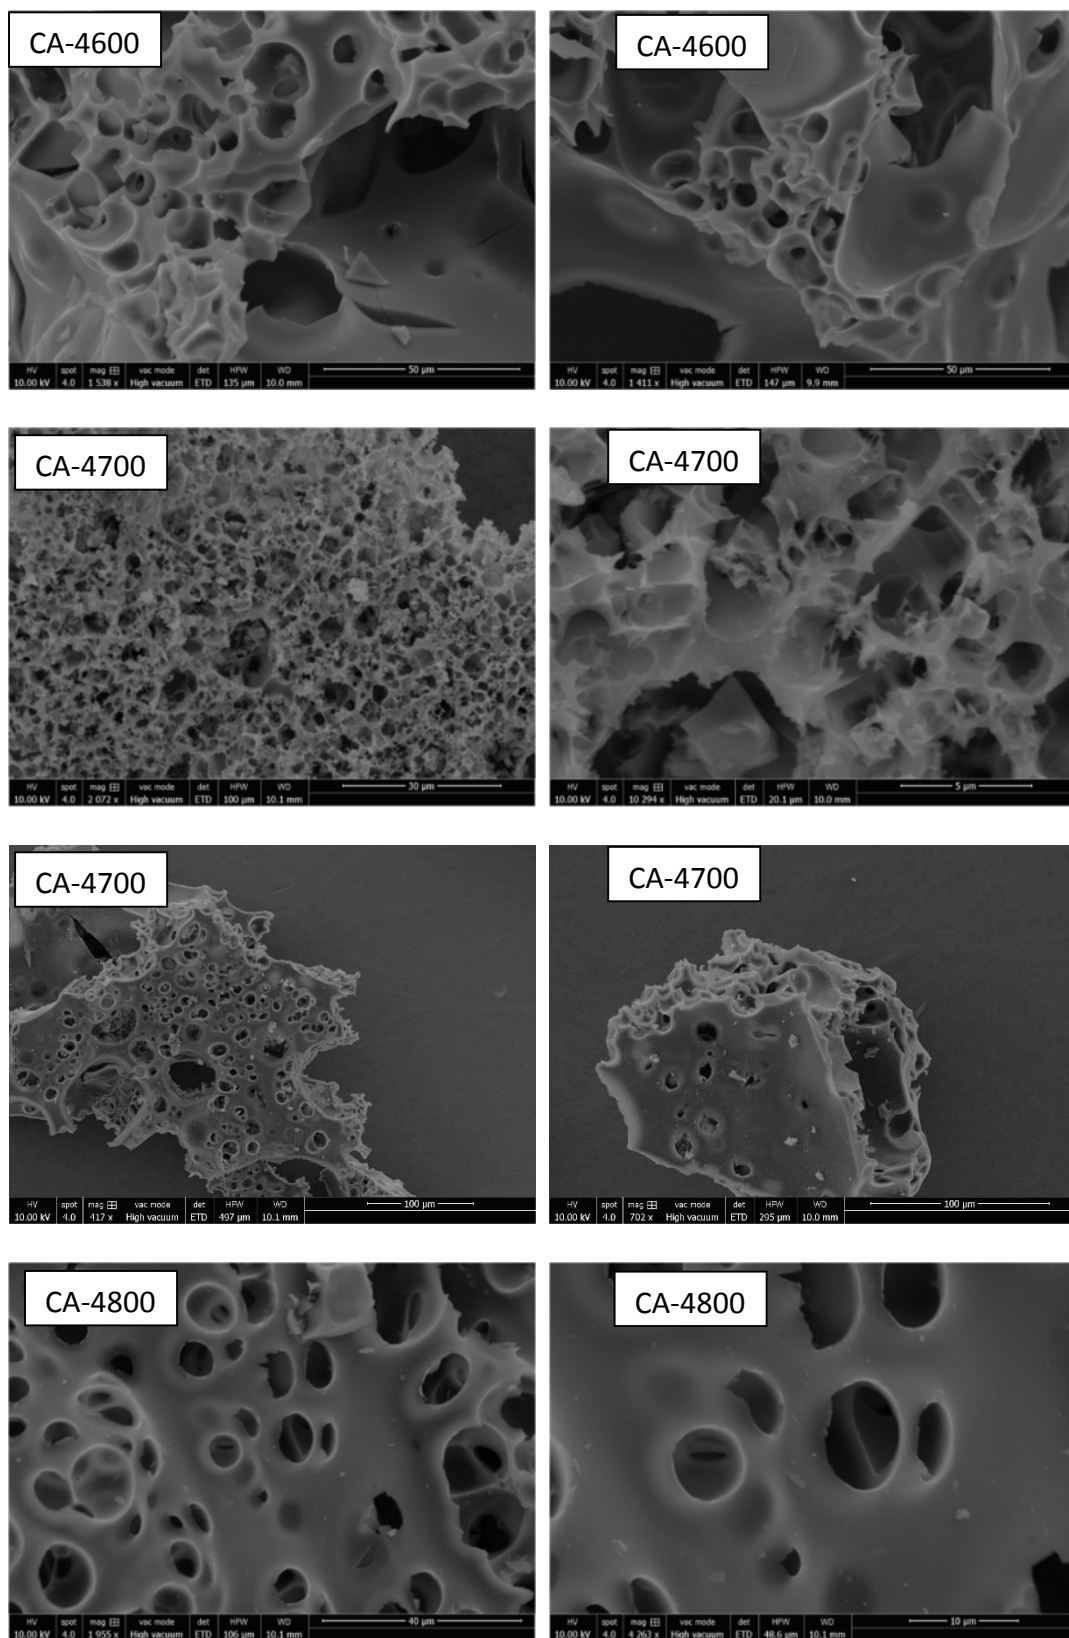

**Supplementary Figure 3.** SEM images of activated carbons prepared from cellulose acetate. The carbons were prepared from activation at various temperatures (600 – 800 °C) of cellulose acetate-derived hydrochar at KOH/hydrochar ratio of 4.

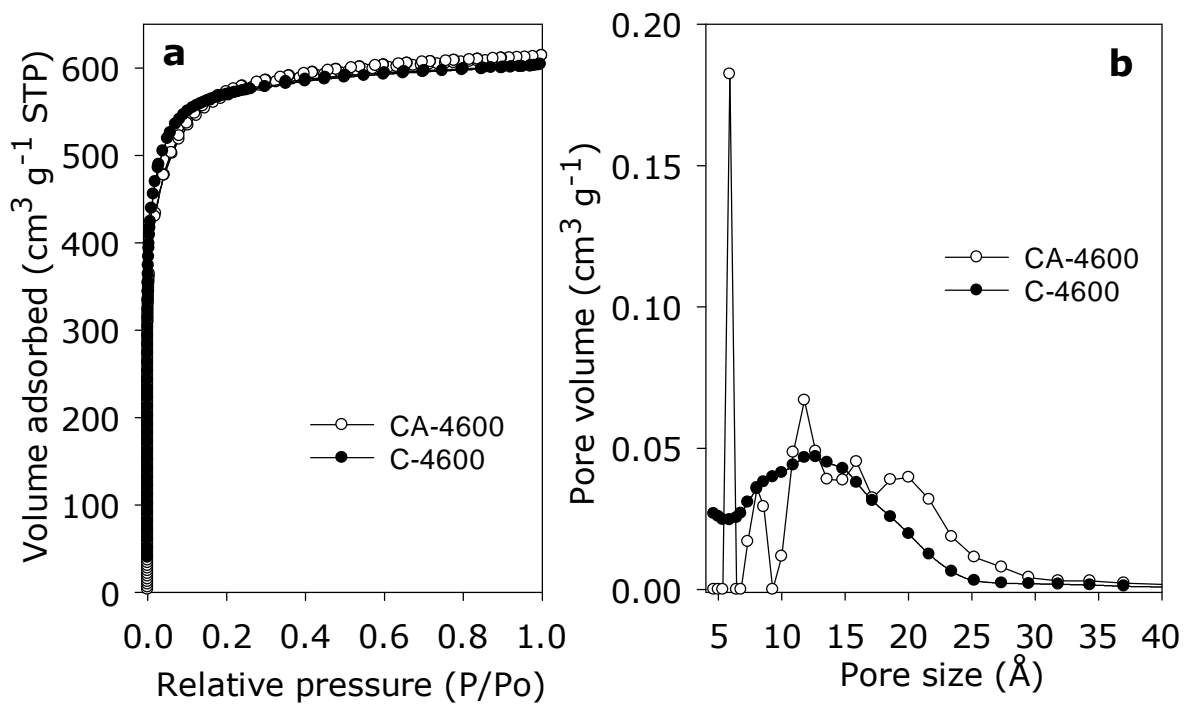

**Supplementary Figure 4.** Porosity of activated carbons prepared under similar conditions but from different precursors. (a) Nitrogen sorption isotherms and (b) pore size distribution curves of activated carbons prepared from cellulose acetate (CA-4600) or cellulose (C-4600) by activation of their respective hydrochars at 600 °C and KOH/hydrochar ratio of 4.

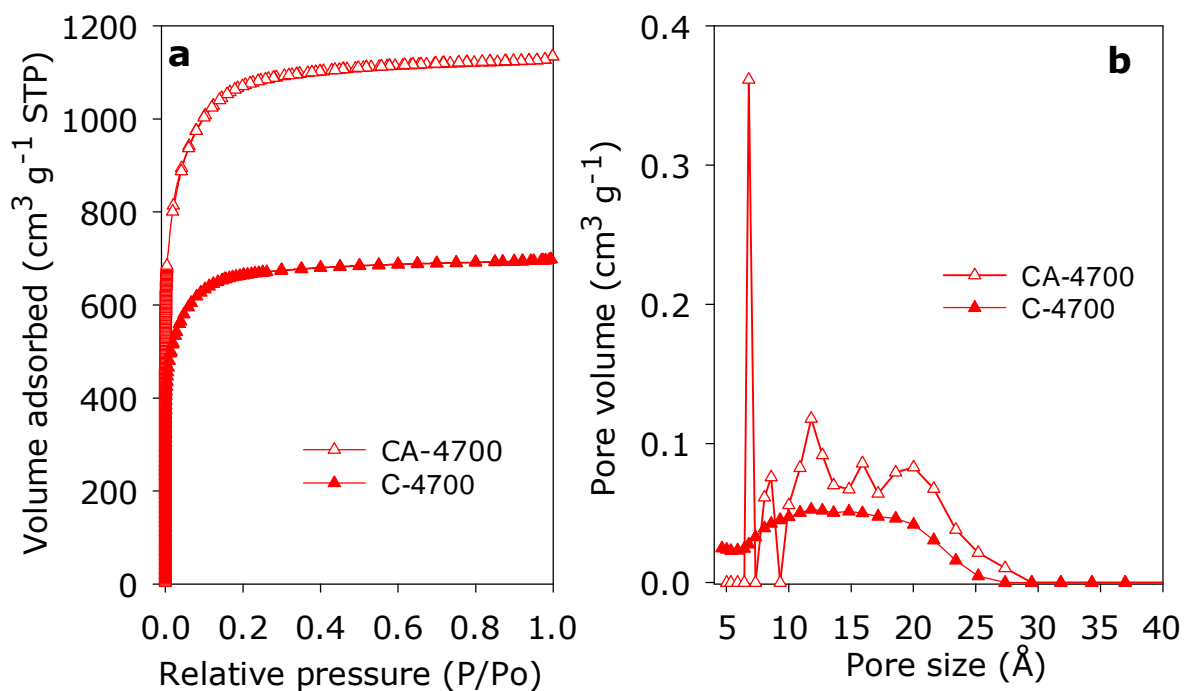

**Supplementary Figure 5.** Porosity of activated carbons prepared under similar conditions but from different precursors. (a) Nitrogen sorption isotherms and (b) pore size distribution curves of activated carbons prepared from cellulose acetate (CA-4700) or cellulose (C-4700) by activation of their respective hydrochars at 700 °C and KOH/hydrochar ratio of 4.

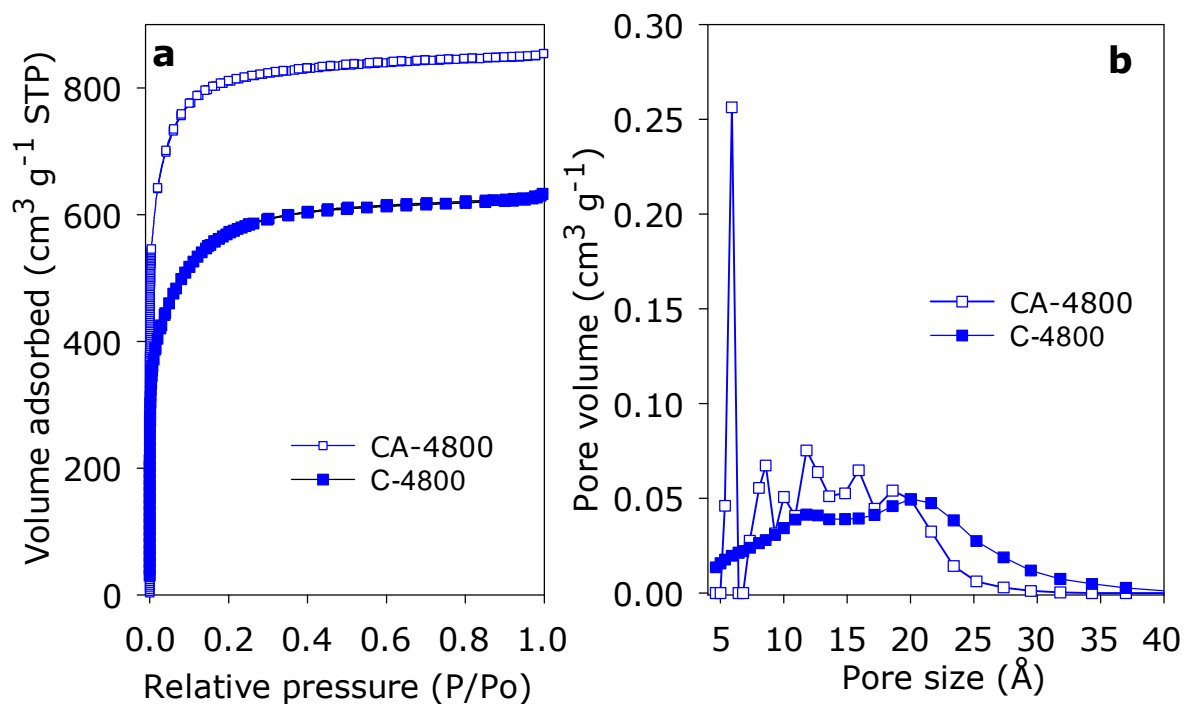

**Supplementary Figure 6.** Porosity of activated carbons prepared under similar conditions but from different precursors. (a) Nitrogen sorption isotherms and (b) pore size distribution curves of activated carbons prepared from cellulose acetate (CA-4800) or cellulose (C-4800) by activation of their respective hydrochars at 800 °C and KOH/hydrochar ratio of 4.

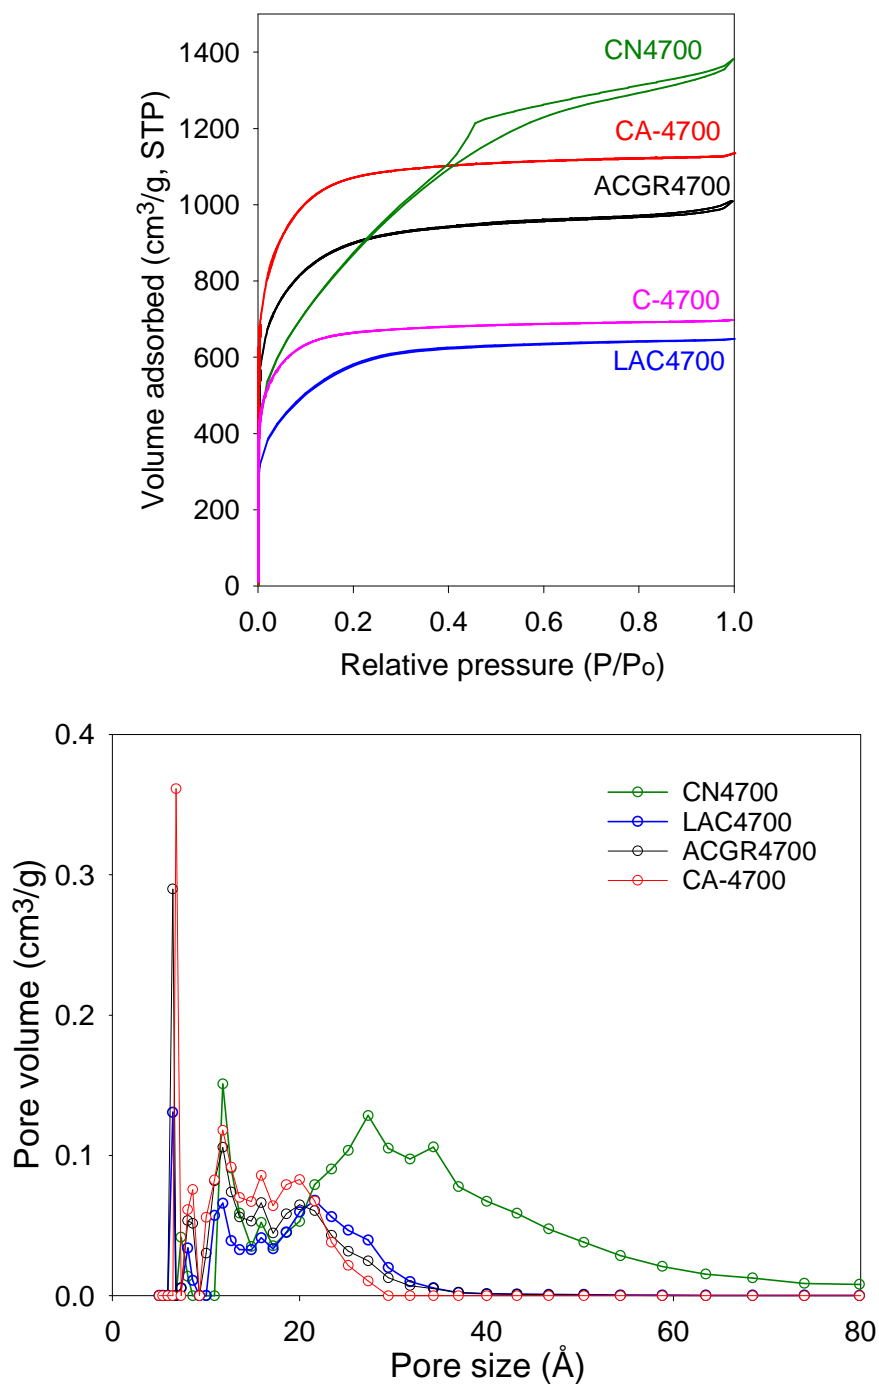

**Supplementary Figure 7.** Porosity of activated carbons prepared under similar conditions but from different precursors. Nitrogen sorption isotherms (top) and pore size distribution curves (bottom) of cellulose acetate-derived activated carbon (CA-4700) compared to analogous activated carbons derived from lignin (LAC4700), grass (ACGR4700) and carbon nanotube superstructures (CN4700) prepared under similar conditions (i.e., 700 °C and KOH/carbon ratio of 4).

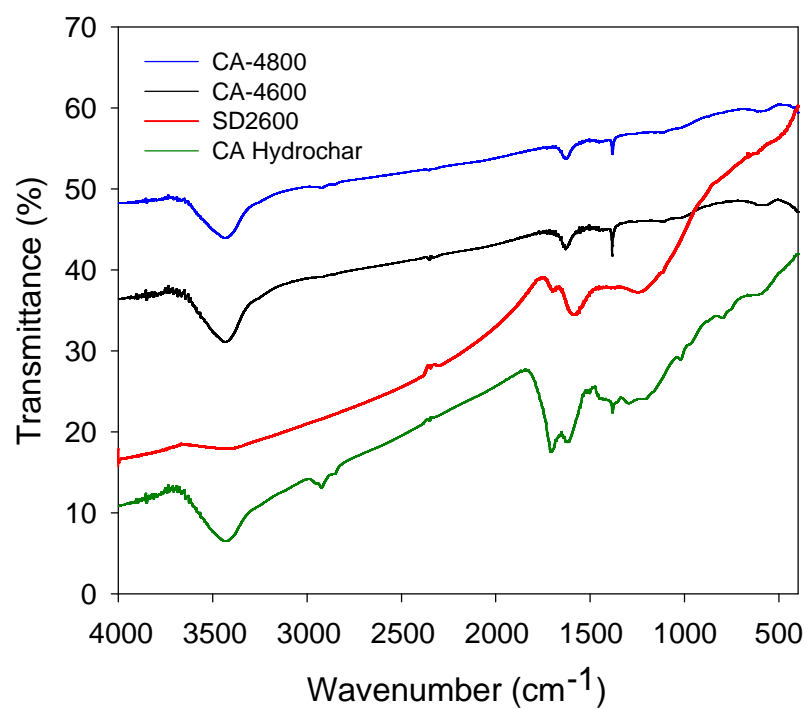

**Supplementary Figure 8.** IR spectra of cellulose acetate-derived CA-hydrochar and activated carbons derived from the CA-hydrochar compared to activated carbon derived from sawdust (SD2600). The IR spectra for SD2600 is adapted from reference 1.



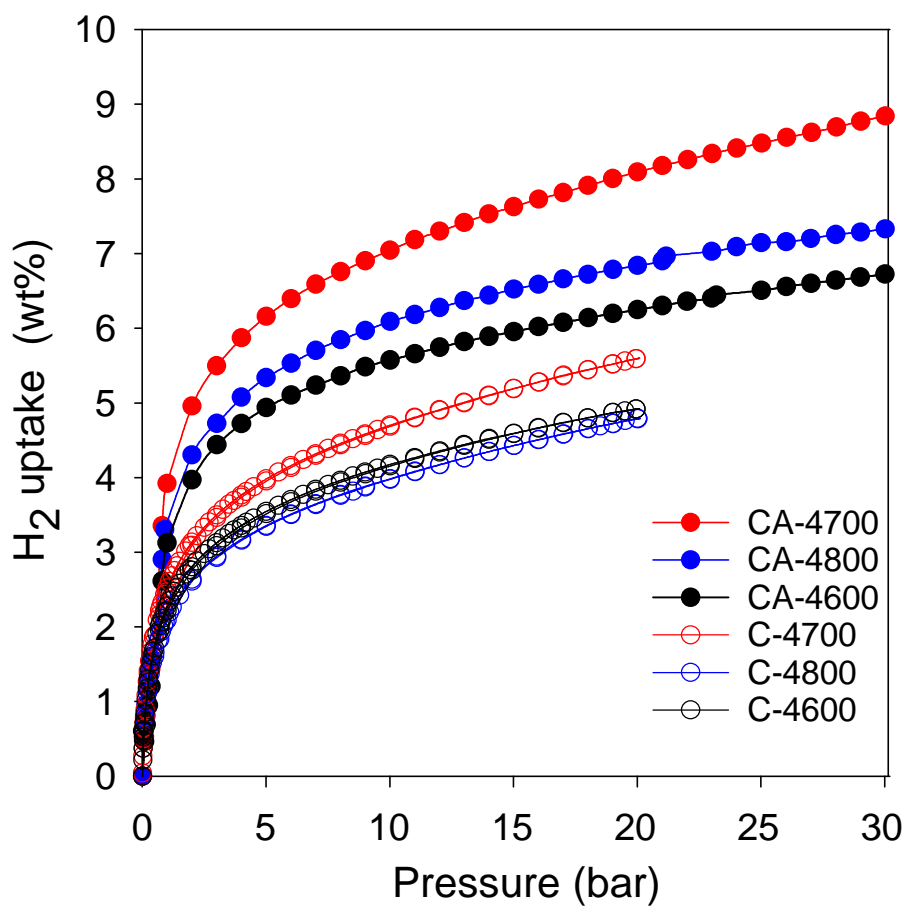

**Supplementary Figure 9.** Total hydrogen uptake of cellulose acetate-derived activated carbons (CA-4T) compared to cellulose-derived activated carbons (C-4T).

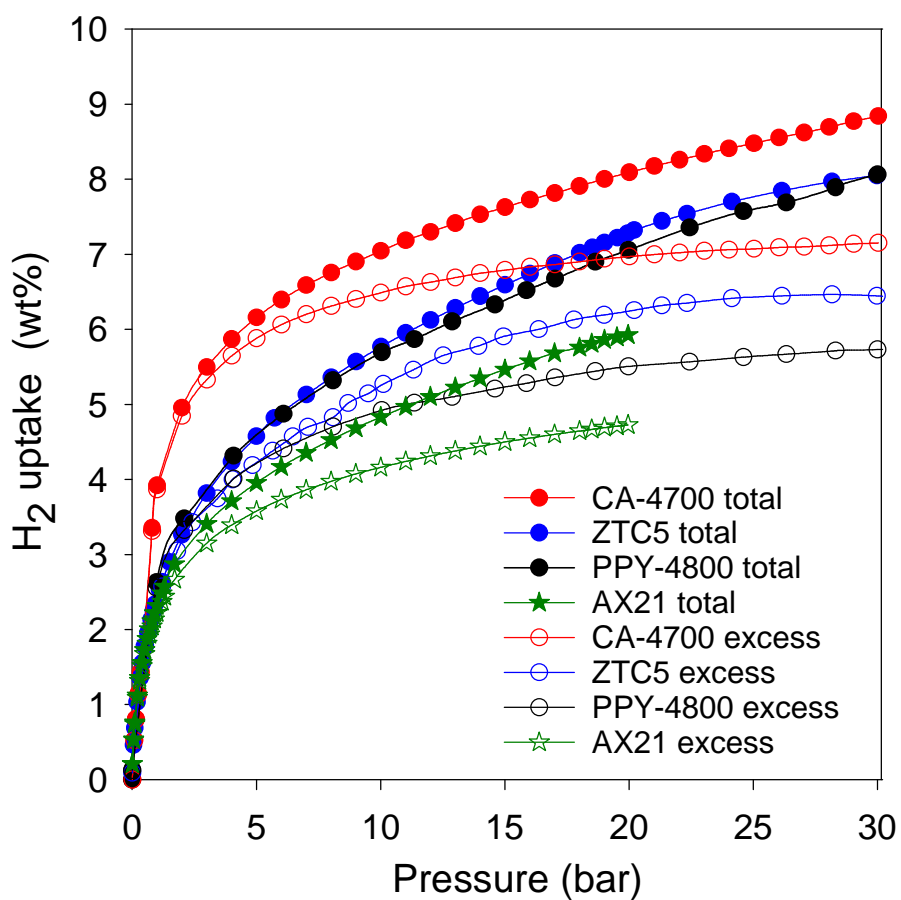

**Supplementary Figure 10.** Excess and total hydrogen uptake of activated carbons derived from cellulose acetate compared to benchmark polypyrrole-derived compactivated carbon (PPY-4800), zeolite templated carbon (ZTC5) and commercially available activated carbon (AX21). Data for PPY-4800 and ZTC5 is taken from reference 2 and 3, respectively.

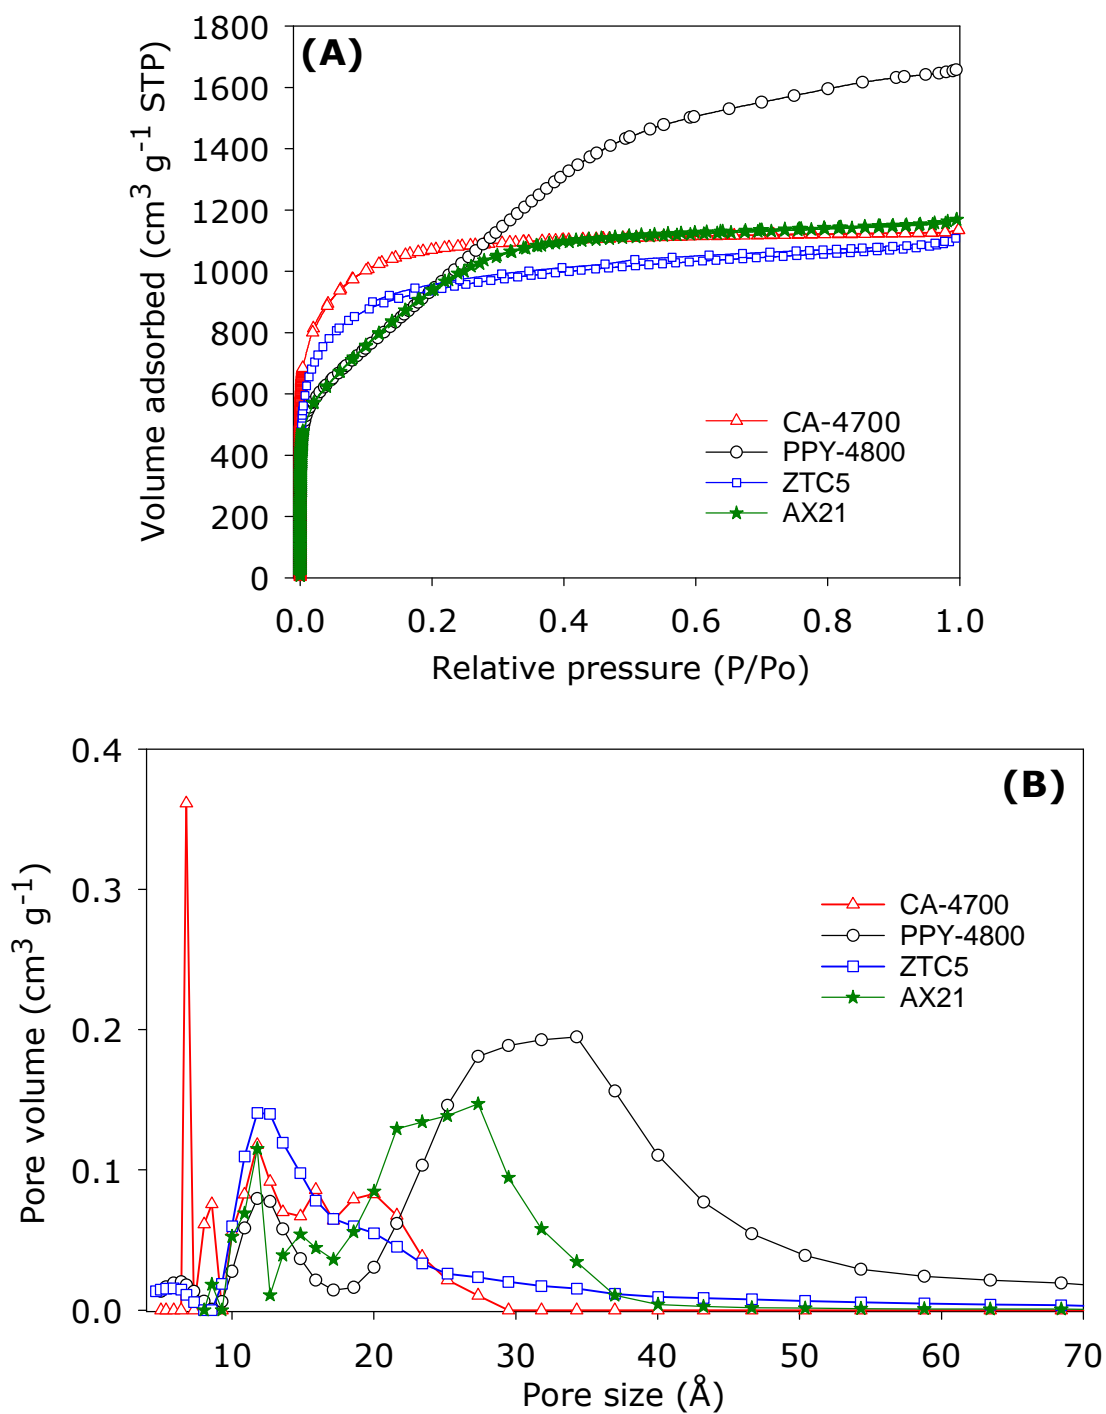

**Supplementary Figure 11.** Nitrogen sorption isotherms (A) and pore size distribution curves (B) of cellulose acetate-derived activated carbon (CA-4700) compared to benchmark polypyrrole-derived compactivated carbon (PPY-4800), zeolite templated carbon (ZTC-5) and commercially available activated carbon (AX21). Data for PPY-4800 and ZTC5 is taken from reference 2 and 3, respectively.

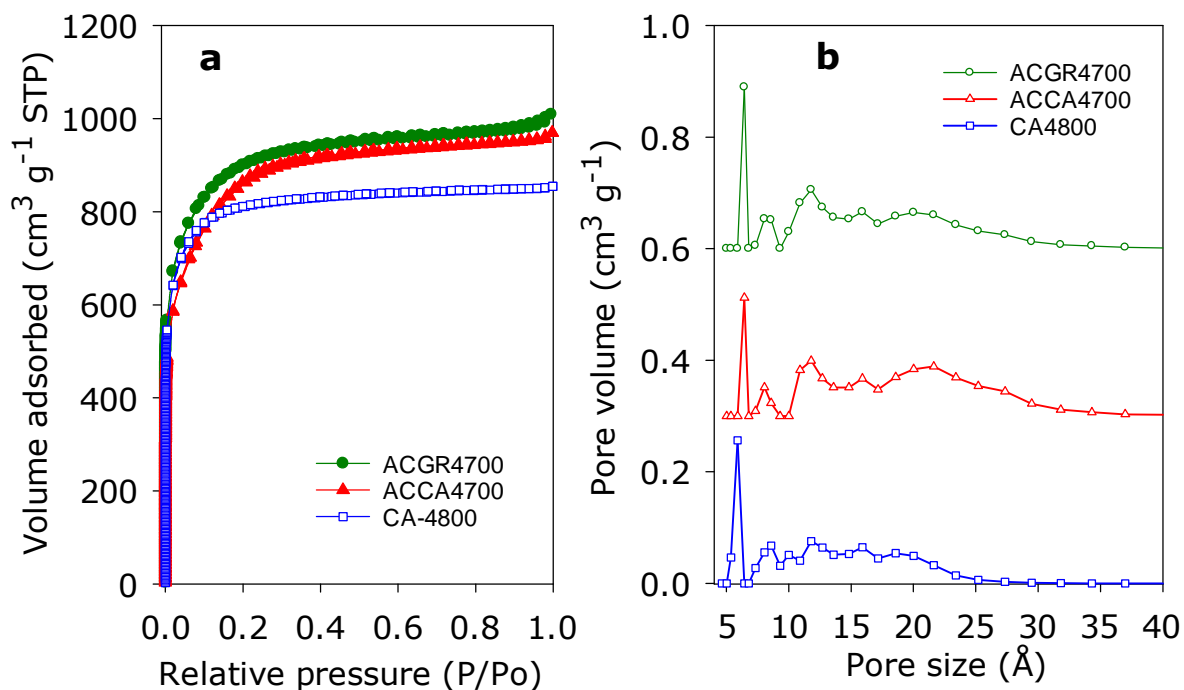

**Supplementary Figure 12.** Porosity of activated carbons prepared under varying conditions and from different precursors. (a) Nitrogen sorption isotherm and (b) pore size distribution curve of cellulose acetate-derived activated carbon (CA-4800) compared to analogous activated carbons with similar porosity derived from the hydrochar of Jujun grass (ACGR4700) and *Camellia Japonica* (ACCA4700). Data for samples ACGR4700) and ACCA4700 is taken from reference 4.

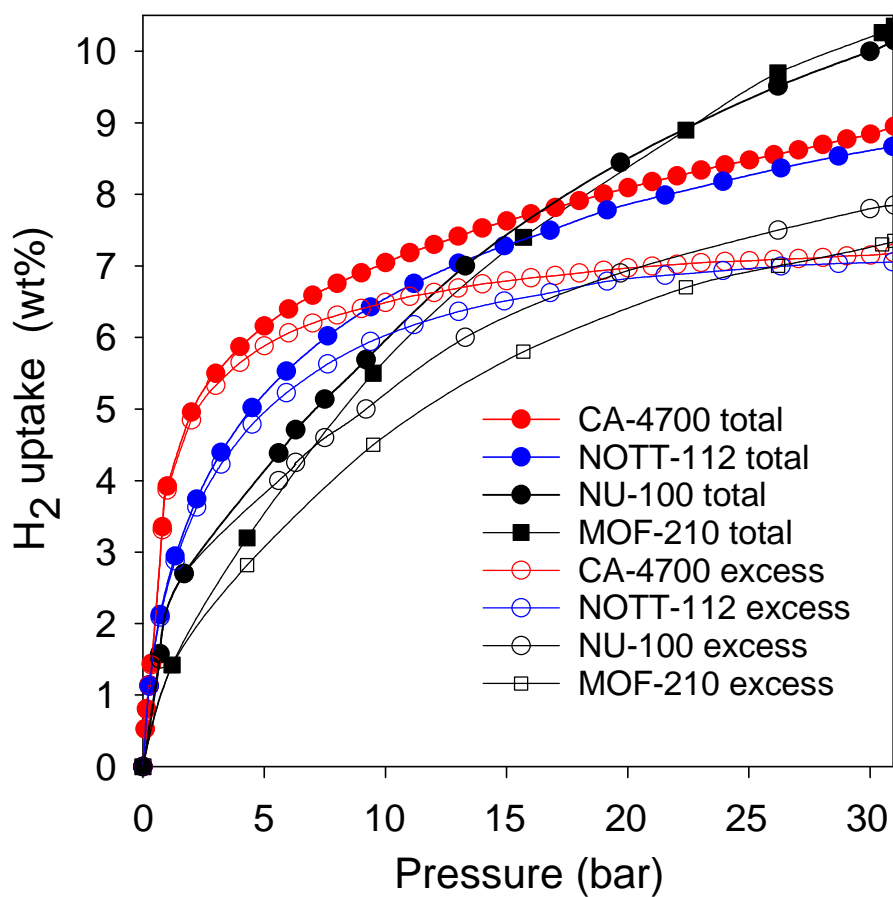

**Supplementary Figure 13.** Excess and total gravimetric hydrogen uptake of activated carbon (CA-4700) derived from cellulose acetate compared to the best benchmark high surface area metal organic frameworks (MOFs), namely, NOTT-112, NU-100 and MOF-210. Data for NOTT-112, NU-100 and MOF-210 is taken from reference 5, 6 and 7, respectively.

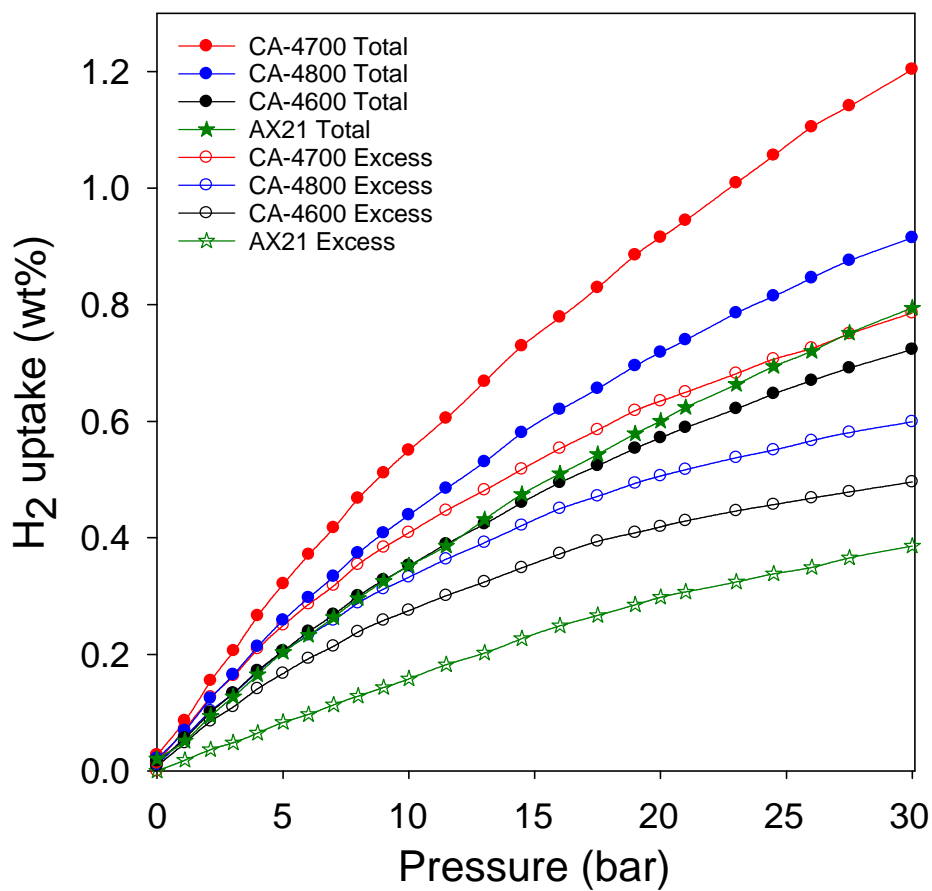

**Supplementary Figure 14.** Excess and total hydrogen uptake at 25 °C and pressure of up to 30 bar of CA-4T activated carbons derived from cellulose acetate and a commercially available activated carbon AX21.

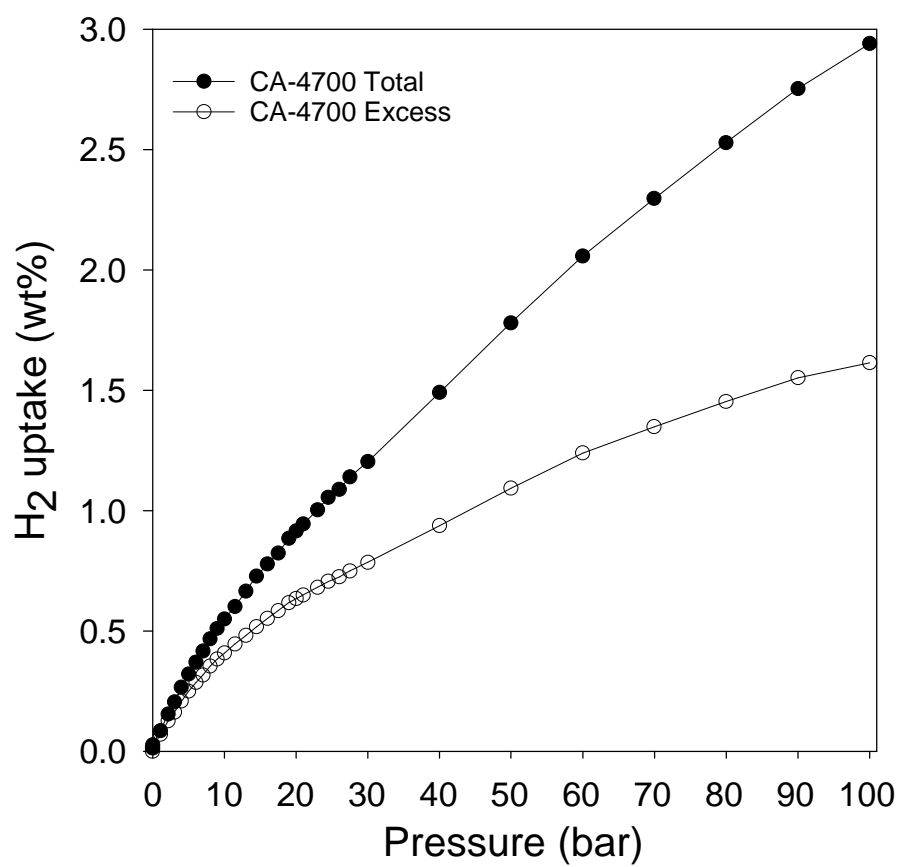

**Supplementary Figure 15.** Excess and total hydrogen uptake at 25 °C and pressure of up to 100 bar of sample CA-4700.

**Supplementary Table 1.** Elemental analysis of cellulose acetate-derived CA-hydrochar and cellulose-derived C-hydrochar and activated carbons derived from the hydrochars.

| Sample       | C [%] | H [%] | O [%] | (O/C) <sup>a</sup> | (H/C) <sup>a</sup> |
|--------------|-------|-------|-------|--------------------|--------------------|
| C-hydrochar  | 69.5  | 6.1   | 24.4  | 0.263              | 1.053              |
| CA-hydrochar | 66.2  | 3.9   | 29.9  | 0.339              | 0.707              |
| C-4600       | 86.9  | 1.2   | 11.5  | 0.099              | 0.163              |
| C-4700       | 92.2  | 0.6   | 7.1   | 0.057              | 0.072              |
| C-4800       | 95.0  | 0.2   | 4.4   | 0.035              | 0.030              |
| CA-4600      | 76.1  | 1.1   | 22.8  | 0.225              | 0.173              |
| CA-4700      | 81.4  | 0.7   | 17.9  | 0.165              | 0.103              |
| CA-4800      | 78.3  | 1.1   | 20.6  | 0.197              | 0.169              |

<sup>a</sup>Atomic ratio



**Supplementary Table 2.** Textural properties and H<sub>2</sub> uptake of cellulose acetate-derived activated carbons (CA-4T) compared to cellulose-derived activated carbons (C-4T).

| Sample  | Surface area <sup>a</sup><br>(m <sup>2</sup> g <sup>-1</sup> ) | Pore volume <sup>b</sup><br>(cm <sup>3</sup> g <sup>-1</sup> ) | Pore size <sup>c</sup><br>(Å) | H <sub>2</sub> uptake <sup>d</sup> (wt%) |                     |
|---------|----------------------------------------------------------------|----------------------------------------------------------------|-------------------------------|------------------------------------------|---------------------|
|         |                                                                |                                                                |                               | 1 bar                                    | 20 bar <sup>e</sup> |
| CA-4600 | 2001 (1790)                                                    | 0.95 (0.79)                                                    | 6/8.5/12                      | 3.1                                      | 6.2 (5.6)           |
| CA-4700 | 3771 (3484)                                                    | 1.75 (1.54)                                                    | 7/8.5/12                      | 3.9                                      | 8.1 (7.0)           |
| CA-4800 | 2864 (2662)                                                    | 1.32 (1.17)                                                    | 6/8.5/12                      | 3.4                                      | 6.8 (6.0)           |
| C-4600  | 2014 (1843)                                                    | 0.94 (0.81)                                                    | 12                            | 2.3                                      | 4.9 (4.3)           |
| C-4700  | 2370 (2201)                                                    | 1.08 (0.96)                                                    | 12/15                         | 2.5                                      | 5.6 (4.9)           |
| C-4800  | 2047 (1707)                                                    | 0.98 (0.74)                                                    | 12/20                         | 2.1                                      | 4.8 (4.2)           |

Values in the parenthesis refer to: <sup>a</sup>micropore surface area and <sup>b</sup>micropore volume. <sup>c</sup>Pore size distribution maxima obtained from NLDFT analysis. <sup>d</sup>Gravimetric (wt%) H<sub>2</sub> uptake at -196 °C and various pressures (i.e., 1 or 20 bar). <sup>e</sup>The values in parenthesis are excess H<sub>2</sub> uptake.

**Supplementary Table 3.** Textural properties and H<sub>2</sub> uptake of cellulose acetate-derived activated carbon (CA-4700) compared to cellulose-derived activated carbon (C-4700), and analogous activated carbons derived from the hydrochar of other biomass, namely, glucose (G-4700), starch (S-4700), eucalyptus sawdust (E-4700), furfural (F-4700), lignin (LAC4700), jujun grass (ACGR4700), *Camellia Japonica* (ACCA4700), and carbon nanotube superstructures (CN4700), under similar activation conditions (i.e., at 700 °C and KOH/carbon ratio of 4).

| Sample   | Surface area <sup>a</sup><br>(m <sup>2</sup> g <sup>-1</sup> ) | Pore volume <sup>b</sup><br>(cm <sup>3</sup> g <sup>-1</sup> ) | Pore size <sup>c</sup><br>(Å) | H <sub>2</sub> uptake <sup>d</sup> (wt%) |                     | Reference |
|----------|----------------------------------------------------------------|----------------------------------------------------------------|-------------------------------|------------------------------------------|---------------------|-----------|
|          |                                                                |                                                                |                               | 1 bar                                    | 20 bar <sup>e</sup> |           |
| CA-4700  | 3771 (3484)                                                    | 1.75 (1.54)                                                    | 7/8.5/12                      | 3.9                                      | 8.1 (7.0)           | This work |
| C-4700   | 2370 (2201)                                                    | 1.08 (0.96)                                                    | 12/15                         | 2.5                                      | 5.6 (4.9)           | 8         |
| G-4700   | 2121 (2012)                                                    | 1.00 (0.91)                                                    | 12/15                         | 2.4                                      | 5.3 (4.6)           | 8         |
| S-4700   | 2194 (2082)                                                    | 1.01 (0.92)                                                    | 12/15                         | 2.4                                      | 5.4 (4.7)           | 8         |
| E-4700   | 2252 (2088)                                                    | 1.03 (0.91)                                                    | 12/15                         | 2.5                                      | 5.6 (4.9)           | 8         |
| F-4700   | 2179 (2067)                                                    | 1.03 (0.94)                                                    | 12/15                         | 2.5                                      | 5.4 (4.7)           | 8         |
| LAC4700  | 2038 (1832)                                                    | 1.00 (0.84)                                                    | 6/8/11/21                     | 1.9                                      | 5.2 (4.4)           | 9         |
| ACGR4700 | 3144 (2753)                                                    | 1.56 (1.23)                                                    | 6/8/12/20                     | 2.4                                      | 5.5 (4.5)           | 4         |
| ACCA4700 | 2983 (2500)                                                    | 1.50 (1.14)                                                    | 6/12/22                       | 2.4                                      | 5.4 (4.5)           | 4         |
| CN4700   | 3202 (1106)                                                    | 2.14 (0.50)                                                    | 8/12/28                       | 2.4                                      | 6.7 (5.3)           | 10        |

Values in the parenthesis refer to: <sup>a</sup>micropore surface area and <sup>b</sup>micropore volume. <sup>c</sup>Pore size distribution maxima obtained from NLDFT analysis. <sup>d</sup>Gravimetric (wt%) H<sub>2</sub> uptake at -196 °C and various pressures (i.e., 1 or 20 bar). <sup>e</sup>The values in parenthesis are excess H<sub>2</sub> uptake.

**Supplementary Table 4.** Textural properties and H<sub>2</sub> uptake of cellulose acetate-derived activated carbon (CA-4700) compared to benchmark polypyrrole-derived compactivated carbon (PPY-4800), zeolite templated carbon (ZTC-5) and commercially available high surface area activated carbon (AX21).

| Sample   | Surface area <sup>a</sup><br>(m <sup>2</sup> g <sup>-1</sup> ) | Pore volume <sup>b</sup><br>(cm <sup>3</sup> g <sup>-1</sup> ) | Pore size <sup>c</sup><br>(Å) | H <sub>2</sub> uptake <sup>d</sup> (wt%) |                     | Reference |
|----------|----------------------------------------------------------------|----------------------------------------------------------------|-------------------------------|------------------------------------------|---------------------|-----------|
|          |                                                                |                                                                |                               | 1 bar                                    | 20 bar <sup>e</sup> |           |
| CA-4700  | 3771 (3484)                                                    | 1.75 (1.54)                                                    | 7/8.5/12                      | 3.9                                      | 8.1 (7.0)           | This work |
| PPY-4800 | 3844 (-)                                                       | 2.89 (-)                                                       | 13/34                         | 2.2                                      | 7.3 (5.5)           | 2         |
| ZTC-5    | 3322 (2837)                                                    | 1.66 (1.18)                                                    | 12                            | 2.5                                      | 7.3 (6.3)           | 3         |
| AX21     | 3191 (1768)                                                    | 1.80 (0.89)                                                    | 12/21/25                      | 2.1                                      | 5.9 (4.7)           | This work |

Values in the parenthesis refer to: <sup>a</sup>micropore surface area and <sup>b</sup>micropore volume. <sup>c</sup>Pore size distribution maxima obtained from NLDFT analysis. <sup>d</sup>Gravimetric (wt%) H<sub>2</sub> uptake at -196 °C and various pressures (i.e., 1 or 20 bar). <sup>e</sup>The values in parenthesis are excess H<sub>2</sub> uptake.

**Supplementary Table 5.** Excess H<sub>2</sub> uptake of cellulose acetate-derived activated carbon (CA-4800) compared to analogous activated carbons with similar porosity (i.e., surface area, pore volume, pore size and level of microporosity) derived from the hydrochar of Jujun grass (ACGR4700) and *Camellia Japonica* (ACCA4700).<sup>4</sup>

| Sample   | Surface area <sup>a</sup><br>(m <sup>2</sup> g <sup>-1</sup> ) | Pore volume <sup>b</sup><br>(cm <sup>3</sup> g <sup>-1</sup> ) | Pore size <sup>c</sup><br>(Å) | Elemental composition<br>(wt%) |       |       | H <sub>2</sub> uptake <sup>d</sup><br>(wt%) |        |
|----------|----------------------------------------------------------------|----------------------------------------------------------------|-------------------------------|--------------------------------|-------|-------|---------------------------------------------|--------|
|          |                                                                |                                                                |                               | C [%]                          | H [%] | O [%] | 1 bar                                       | 20 bar |
| CA-4800  | 2864 (2662)                                                    | 1.32 (1.17)                                                    | 6/8.5/12                      | 78.3                           | 1.1   | 20.6  | 3.4                                         | 6.0    |
| ACGR4700 | 3144 (2753)                                                    | 1.56 (1.23)                                                    | 6/8/12                        | 86.2                           | 0.5   | 13.3  | 2.4                                         | 4.5    |
| ACCA4700 | 2983 (2500)                                                    | 1.50 (1.14)                                                    | 7/8.5/12                      | 87.0                           | 0.5   | 12.5  | 2.4                                         | 4.5    |

The values in the parenthesis refer to: <sup>a</sup>micropore surface area and <sup>b</sup>micropore volume. <sup>c</sup>Pore size distribution maxima obtained from NLDFIT analysis. <sup>d</sup>Excess (wt%) H<sub>2</sub> uptake at -196 °C and various pressures (i.e., 1 or 20 bar).

**Supplementary Table 6.** Surface area, pore volume hydrogen storage (at -196 °C and 20 or 30 bar) for CA-4T carbons compared to the best benchmark metal organic frameworks (MOFs).

| Sample                | Surface area (m <sup>2</sup> g <sup>-1</sup> ) | Pore Volume (cm <sup>3</sup> g <sup>-1</sup> ) | Gravimetric H <sub>2</sub> uptake (wt%) <sup>a</sup> |            | Volumetric H <sub>2</sub> uptake (g l <sup>-1</sup> ) <sup>b</sup> |         | Reference |
|-----------------------|------------------------------------------------|------------------------------------------------|------------------------------------------------------|------------|--------------------------------------------------------------------|---------|-----------|
|                       |                                                |                                                | Excess                                               | Total      | Excess                                                             | Total   |           |
| CA-4600               | 2001                                           | 0.95                                           | 5.6 (5.8)                                            | 6.2 (6.7)  | 40 (41)                                                            | 44 (48) | This work |
| CA-4700               | 3771                                           | 1.75                                           | 7.0 (7.2)                                            | 8.1 (8.9)  | 32 (33)                                                            | 37 (41) | This work |
| CA-4800               | 2864                                           | 1.32                                           | 6.0 (6.1)                                            | 6.8 (7.3)  | 34 (34)                                                            | 41 (41) | This work |
| NOTT-112 <sup>c</sup> | 3800                                           | 1.62                                           | 6.8 (7.0)                                            | 7.8 (8.6)  | 16 (17)                                                            | 19 (21) | 5,11      |
| NU-100 <sup>c</sup>   | 6143                                           | 2.82                                           | 6.9 (7.8)                                            | 8.5 (10.0) | 11 (12)                                                            | 13 (15) | 6,11      |
| MOF-210 <sup>c</sup>  | 6240                                           | 3.60                                           | 6.4 (7.3)                                            | 8.4 (10.2) | 8 (9)                                                              | 11 (13) | 7,11      |
| MOF-210 <sup>d</sup>  | 6240                                           | 3.60                                           | 6.4 (7.3)                                            | 8.4 (10.2) | 16 (18)                                                            | 22 (26) | 7,11      |

<sup>a</sup>Gravimetric excess and total H<sub>2</sub> uptake at -196 °C and 20 bar or (for values in parenthesis) at 30 bar. <sup>b</sup>Volumetric excess and total H<sub>2</sub> uptake at -196 °C and 20 bar or (for values in parenthesis) at 30 bar. Packing density values (g cm<sup>-3</sup>) used, according to reference 11, are: 0.23 (NOTT-112),<sup>11</sup> 0.15 (NU-100)<sup>11</sup> and 0.125 (MOF-210).<sup>11</sup> The packing density values are based on experimental data (reference 11) that shows that the actual “tapped density” of MOFs is roughly one-half of the ‘ideal’ crystal density. <sup>d</sup>Crystal density (0.25 g cm<sup>-3</sup>)<sup>7</sup> was used to calculate volumetric storage capacity values.

## Supplementary References

1. Balahmar, M., Mitchell, A. C. & Mokaya, R. Generalized mechanochemical synthesis of biomass-derived sustainable carbons for high performance CO<sub>2</sub> storage. *Adv. Energy Mater.* **5**, 1500867 (2015).
2. Adeniran, B. & Mokaya, R. Compactation: A mechanochemical approach to carbons with superior porosity and exceptional performance for hydrogen and CO<sub>2</sub> storage. *Nano Energy* **16**, 173–185 (2015).
3. Masika, E. & Mokaya, R. Exceptional gravimetric and volumetric hydrogen storage for densified zeolite templated carbons with high mechanical stability. *Energy Environ. Sci.* **7**, 427–434 (2014).
4. Coromina, H. M., Walsh, D. A. & Mokaya, R. Biomass-derived activated carbon with simultaneously enhanced CO<sub>2</sub> uptake for both pre and post combustion capture applications. *J. Mater. Chem. A* **4**, 280–289 (2016).
5. Yan, Y., Lin, X., Yang, S., Blake, A. J., Dailly, A., Champness, N. R., Hubberstey, P. & Schroder, M. Exceptionally high H<sub>2</sub> storage by a metal organic polyhedral framework. *Chem. Commun.* 1025–1027 (2009).
6. Farha, O. K., Yazaydin, A. O., Eryazici, I., Malliakas, C. D., Hauser, B. G., Kanatzidis, M. G., Nguyen, S. T., Snurr, R. I. Q. & Hupp, J. T. De novo synthesis of a metal–organic framework material featuring ultrahigh surface area and gas storage capacities, *Nat. Chem.* **2**, 944–948 (2010).
7. Furukawa, H., Ko, N., Go, Y. B., Aratani, N., Choi, S. B., Choi, E., Yazaydin, A. O., Snurr, R. Q., O’Keeffe, M., Kim, J. & Yaghi, O.M. Ultra-high porosity in metal–organic frameworks. *Science* **329**, 424–428 (2010).
8. Sevilla, M., Fuertes, A. B. & Mokaya R. High density hydrogen storage in superactivated carbons from hydrothermally carbonized renewable organic materials. *Energy Environ. Sci.* **3**, 1400–1410 (2011).
9. Sangchoom, W. & Mokaya, R. Valorization of lignin waste: Carbons from hydrothermal carbonization of renewable lignin as superior sorbents for CO<sub>2</sub> and Hydrogen storage. *ACS Sust. Chem. Eng.* **3**, 1658–1667 (2015).
10. Adeniran, B. & Mokaya, R. Low temperature synthesized carbon nanotube superstructures with superior CO<sub>2</sub> and hydrogen storage capacity. *J. Mater. Chem. A* **3**, 5148–5161 (2015).

11. Peng, Y., Krungleviciute, V., Eryazici, I., Hupp, J. T., Farha, O. K. & Yildirim, T. Methane storage in Metal–Organic Frameworks: Current records, surprise findings, and challenges. *J. Am. Chem. Soc.* 2013, **135**, 11887–11894.
